# Supplementary material for: A non-enzymatic disposable electrochemical sensor based on surface-modified screen-printed electrode CuO-IL/rGO nanocomposite for a single-step determination of glucose in human urine and electrolyte drinks
Source: Royal Society of Chemistry journal article supplement (doi:10.1039/d1ay00676b), 2021-01-01
Supplement: d1ay00676b1.pdf [file d1ay00676b1.pdf]

## Supplementary data

### **A Non-Enzymatic Disposable Electrochemical Sensor Based on Surface-Modified Screen-Printed Electrodes CuO-IL/rGO Nanocomposite for Single-Step Determination of Glucose in Human Urine and Electrolyte Drink**

Nopparat Janmee, †<sup>a</sup> Pattarachaya Preechakasedkit, †<sup>b</sup> Nadnudda Rodthongkum, <sup>b, c</sup> Orawon Chailapakul, <sup>d</sup> Pranut Potiyaraj <sup>\*\*a, c, e</sup> and Nipapan Ruecha <sup>\*b, f</sup>

<sup>a</sup> Department of Materials Science, Faculty of Science, Chulalongkorn University, Pathumwan, Bangkok 10330, Thailand

<sup>b</sup> Metallurgy and Materials Science Research Institute, Chulalongkorn University, Soi Chula 12, Phayathai Rd., Pathumwan, Bangkok 10330, Thailand

<sup>c</sup> Center of Excellence in Responsive Wearable Materials, Chulalongkorn University, Bangkok, 10330, Thailand

<sup>d</sup> Department of Chemistry, Faculty of Science, Chulalongkorn University, Bangkok 10330, Thailand

<sup>e</sup> Center of Excellence on Petrochemical and Materials Technology, Chulalongkorn University, Research Building, Soi Chula 12, Phayathai Rd., Pathumwan, Bangkok 10330, Thailand

<sup>f</sup> Food Risk Hub, Research Unit of Chulalongkorn University, Bangkok 10330, Thailand

\* Corresponding author Email: nipapan.r@chula.ac.th

\*\* Co-corresponding author Email: Pranut.p@chula.ac.th

† These authors contributed equally to this article.

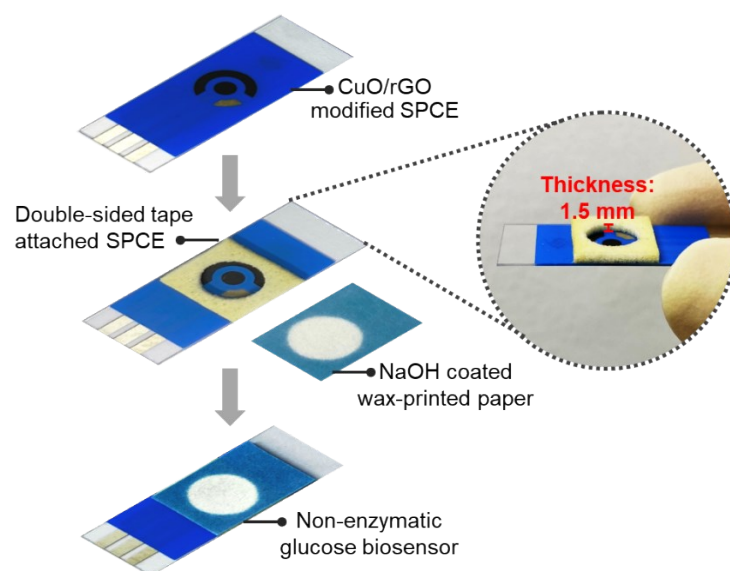

**Figure S1** Assembly of a novel device design for a non-enzymatic glucose sensor.

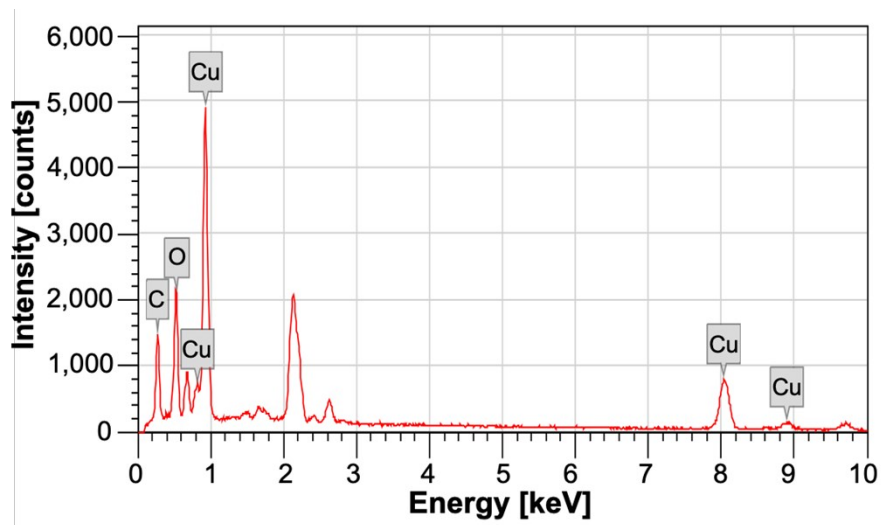

**Figure S2** SEM-EDX spectrum of CuO-IL/rGO modified SPCE.

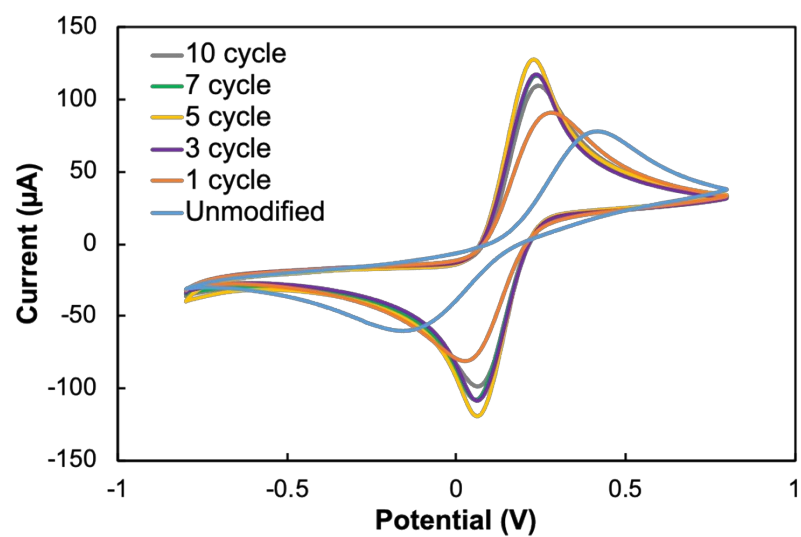

**Figure S3** Cyclic voltammograms of 5.0 mM  $[\text{Fe}(\text{CN})_6]^{3-/4-}$  in 0.1 M KCl using rGO modified SPCE with different reducing cycles (0-10 cycles).

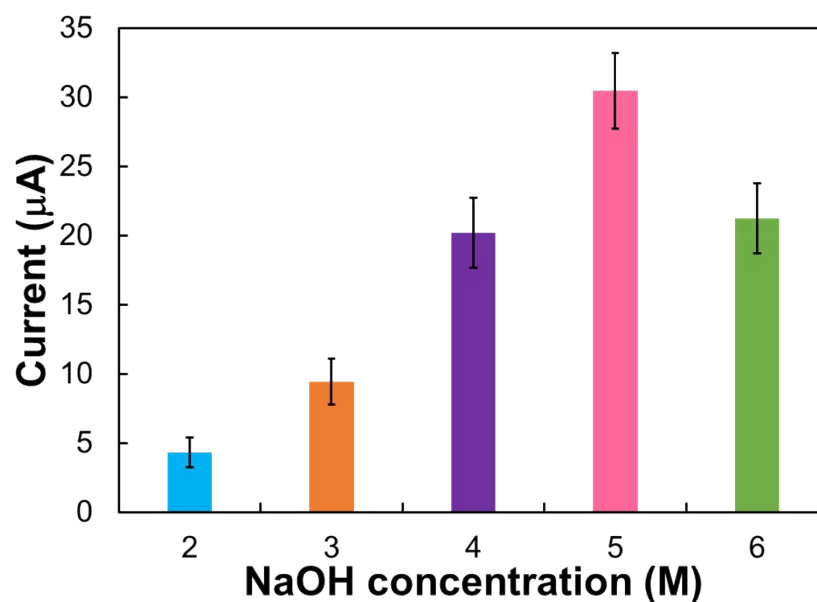

**Figure S4** Anodic peak currents from cyclic voltammogram of 5.0 mM glucose in 0.1 M PBS (pH 6.0) with difference concentrations of NaOH (2.0–6.0 M) coated on the patterned wax paper as the sample loading zone, the error bar obtained by measurement using 3 individual single-use portable glucose biosensor ( $n = 3$ ).

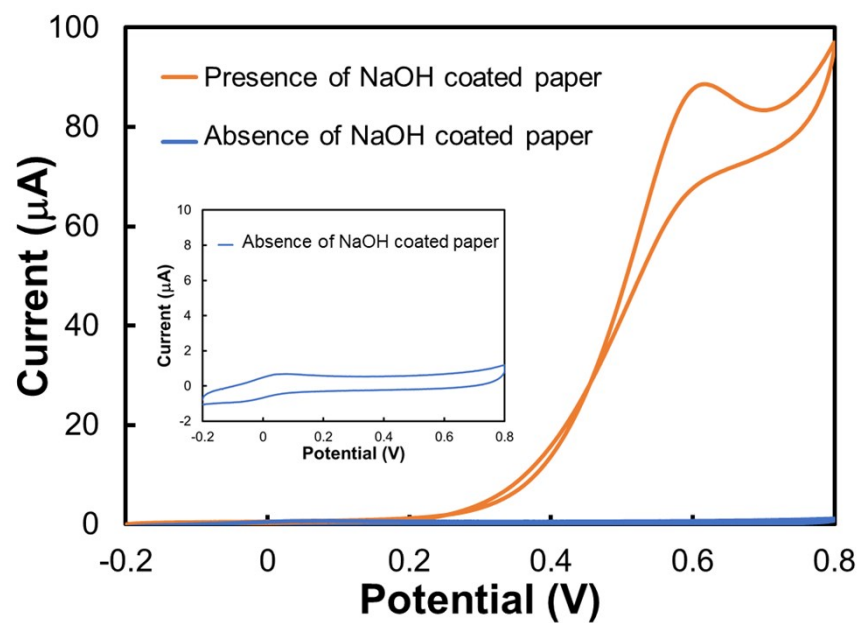

**Figure S5** Cyclic voltammograms of 1.0 mM glucose in 0.1 M PBS (pH 6.0) using a novel designed device in the absence (inset) and presence of NaOH coated wax-printed paper.

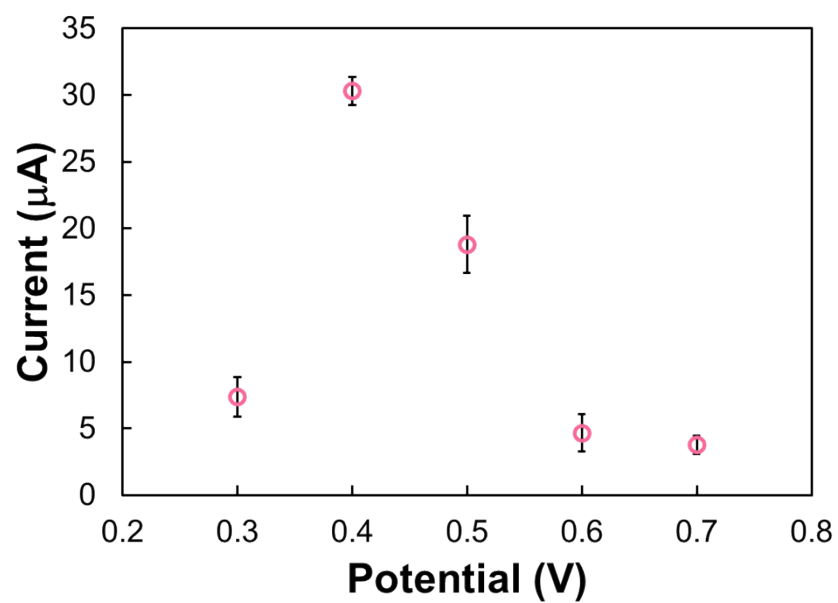

**Figure S6** Signal to background ratio (S/B) of 5.0 mM glucose in 0.1 M PBS (pH 6.0) with different potentials ranging from +0.3 to +0.7 V (vs. Ag/AgCl) at 60 s ( $n = 3$ ) via amperometry.

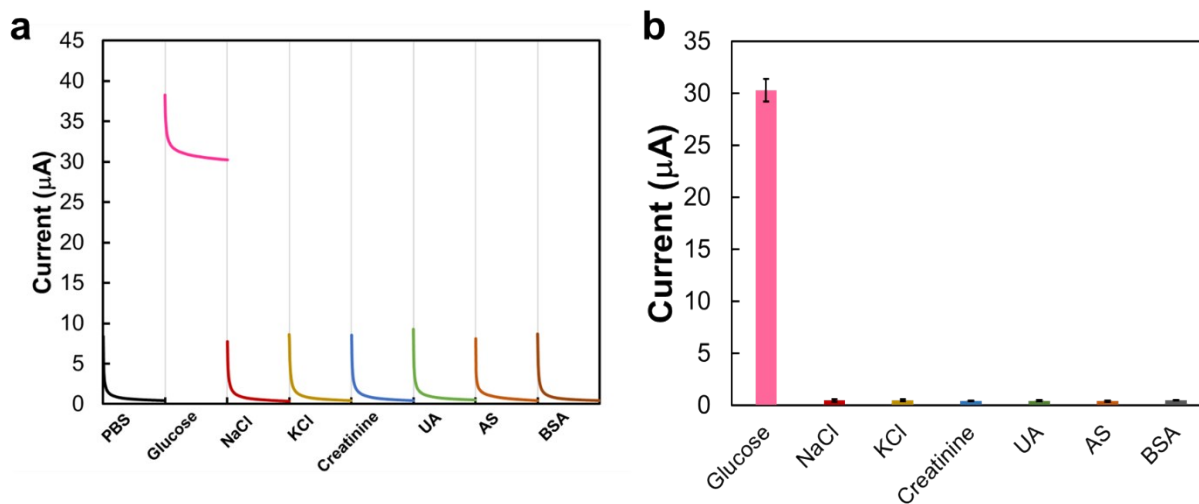

**Figure S7** a) Amperometric current responses towards 5.0 mM glucose in 0.1 M PBS (pH 6.0) on the portable CuO-IL/rGO modified SPCE in the absence and presence of several interferences b) the average current responses from Fig. S7a by measurements using 3 individual single-use devices ( $n = 3$ ).



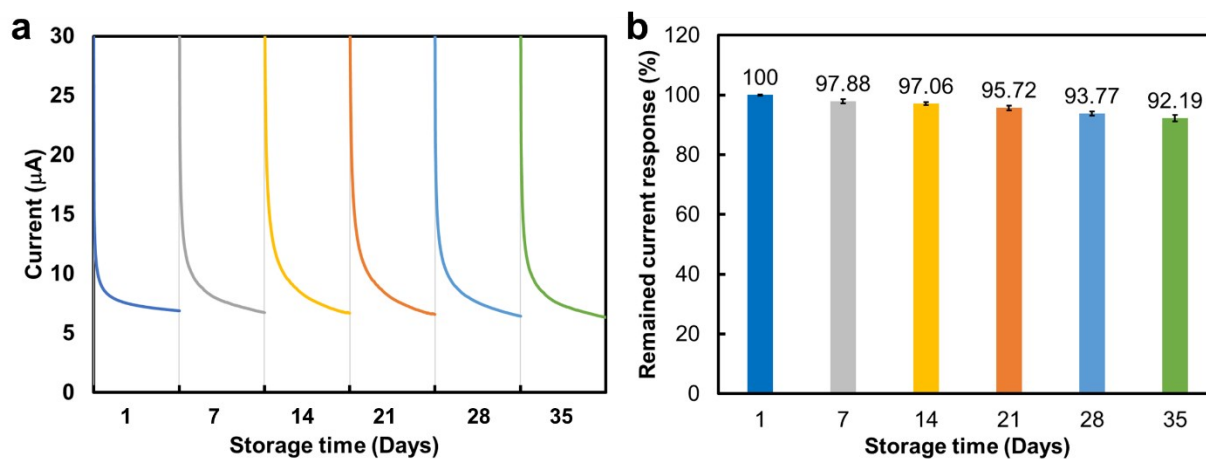

**Figure S8** a) Amperometric current responses towards 1.0 mM glucose in 0.1 M PBS (pH 6.0) on the portable CuO-IL/rGO modified SPCE after storage in the sealed system at dry environmental for 7, 14, 21, 28 and 35 days b) the remained current responses from Fig. S8a by measurements using 3 individual single-use devices ( $n = 3$ ).
